# Supplementary material for: γδ T cells control humoral immune response by inducing T follicular helper cell differentiation
Source: PubMed Central journal article supplement (PMC6082880; doi:10.1038/s41467-018-05487-9), 2018-08-08
Supplement: 41467_2018_5487_MOESM1_ESM.pdf [file 41467_2018_5487_MOESM1_ESM.pdf]

**$\gamma\delta$  T cells control humoral immune response by inducing T follicular helper cell differentiation**

Rezende et al.

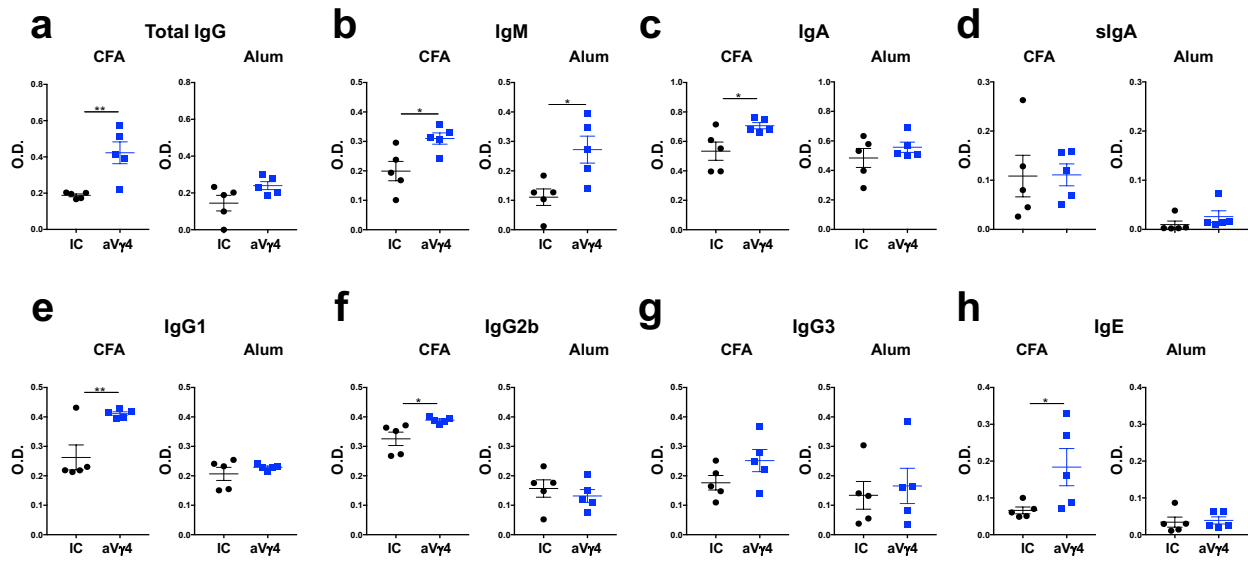

**Supplementary Figure 1.** Differential involvement of  $\gamma\delta$  T cell subsets on OVA-specific antibody production. **(a-h)** Serum and fecal (secretory IgA) OVA-specific total IgG **(a)**, IgM **(b)**, IgA **(c)**, secretory IgA (slgA; **d**), IgG1 **(e)**, IgG2b **(f)**, IgG3 **(g)** and IgE **(h)** from WT mice treated with either anti-V $\gamma$ 4 depleting monoclonal antibody (aV $\gamma$ 4) or isotype control (IC) three days before s.c. immunization with either OVA+CFA or OVA+Alum and three days before an OVA booster dose. Mice received a boost of OVA 14 days after immunization (n=5 mice/group). Data are shown as mean  $\pm$  SEM. One-way ANOVA was used. NS= non-significant, \* p<0.05, \*\* p<0.01.

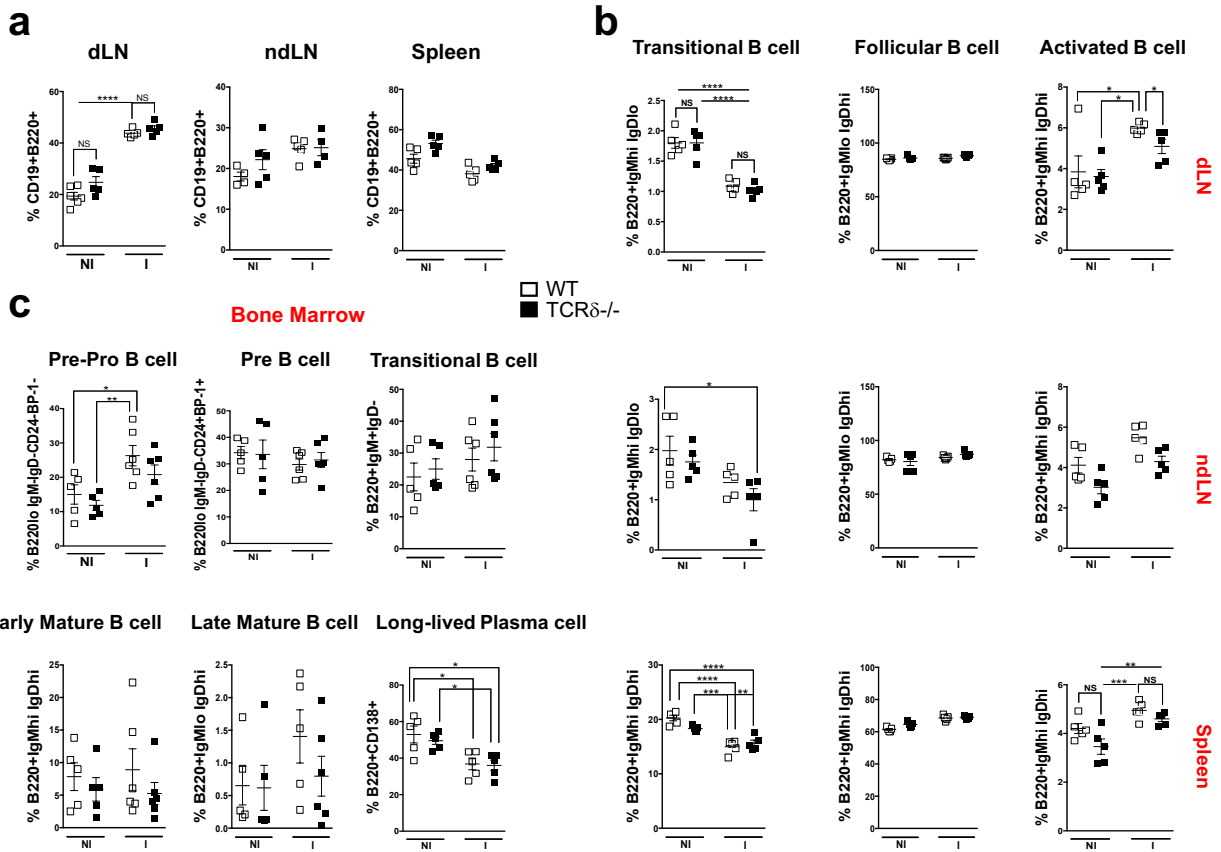

**Supplementary Figure 2.** B cell compartment is not impaired in TCR $\delta^{-/-}$  mice. **(a)** Frequency of total B cells (CD19+B220+) in dLN, ndLN and spleen of non-immunized (NI) WT and TCR $\delta^{-/-}$  mice and 7 days after CFA immunization (I) (n=4-6 mice/group). **(b)** Frequency of Transitional (B220+IgM<sup>hi</sup>IgD<sup>lo</sup>), Follicular (B220+IgM<sup>lo</sup>IgD<sup>hi</sup>) or Activated (B220+IgM<sup>hi</sup>IgD<sup>hi</sup>) B cells in dLN, ndLN and spleen of non-immunized (NI) WT and TCR $\delta^{-/-}$  mice and 7 days after CFA immunization (I) (n=5 mice/group). **(c)** Frequency of Pre-Pro (B220<sup>lo</sup>IgM-IgD-CD24-BP-1-), Pre (B220<sup>lo</sup>IgM-IgD-CD24+BP-1+), Transitional (B220+IgM+IgD-), Early Mature (B220+IgM<sup>hi</sup>IgD<sup>hi</sup>), Late Mature (B220+IgM<sup>lo</sup>IgD<sup>hi</sup>) B cells and long-lived plasma cells (B220+CD138+) from bone marrow of non-immunized (NI) WT and TCR $\delta^{-/-}$  mice and 7 days after CFA immunization (I) (n=5 mice/group). These data are representative of 2 independent experiments. Data are shown as mean  $\pm$  SEM. One-way ANOVA was used. NS= non-significant, \* p<0.05, \*\* p<0.01, \*\*\* p<0.001, \*\*\*\* p<0.0001.

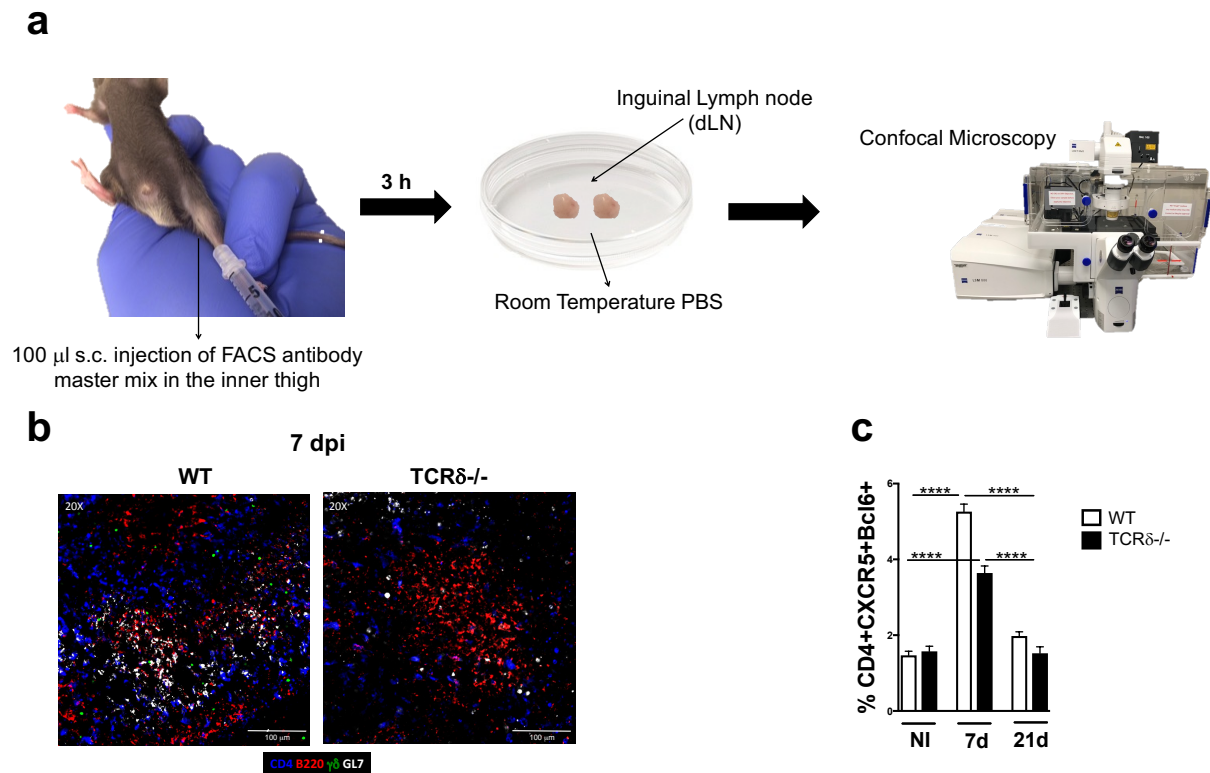

**Supplementary Figure 3.** Germinal center formation is impaired in TCR $\delta^{-/-}$  mice. **(a)** Protocol for whole lymph node confocal microscopy. Mice were injected s.c. in the thigh with 20  $\mu$ l of a master mix of FACS antibodies and 3h later they were sacrificed and inguinal lymph nodes (dLN) collected for confocal microscopy. **(b)** Representative confocal microscopy images of whole lymph nodes (dLN) of non-immunized (NI) TCR $\gamma\delta$ -GFP and TCR $\delta^{-/-}$  mice, and 7 days post CFA immunization (dpi). Scale bar=100  $\mu$ m. CD4-blue; B220-red; TCR $\gamma\delta$ -green; GL7-gray (n=5 mice/group). **(c)** Frequency of CD4+ T cells expressing CXCR5 and Bcl6 in the dLNs of non-immunized (NI) WT and TCR $\delta^{-/-}$  mice and 7 and 21 days post CFA immunization (n=6 mice/group). These data are representative of 2 independent experiments. Data are shown as mean  $\pm$  SEM. One-way ANOVA was used. \*\*\*\* p<0.0001.

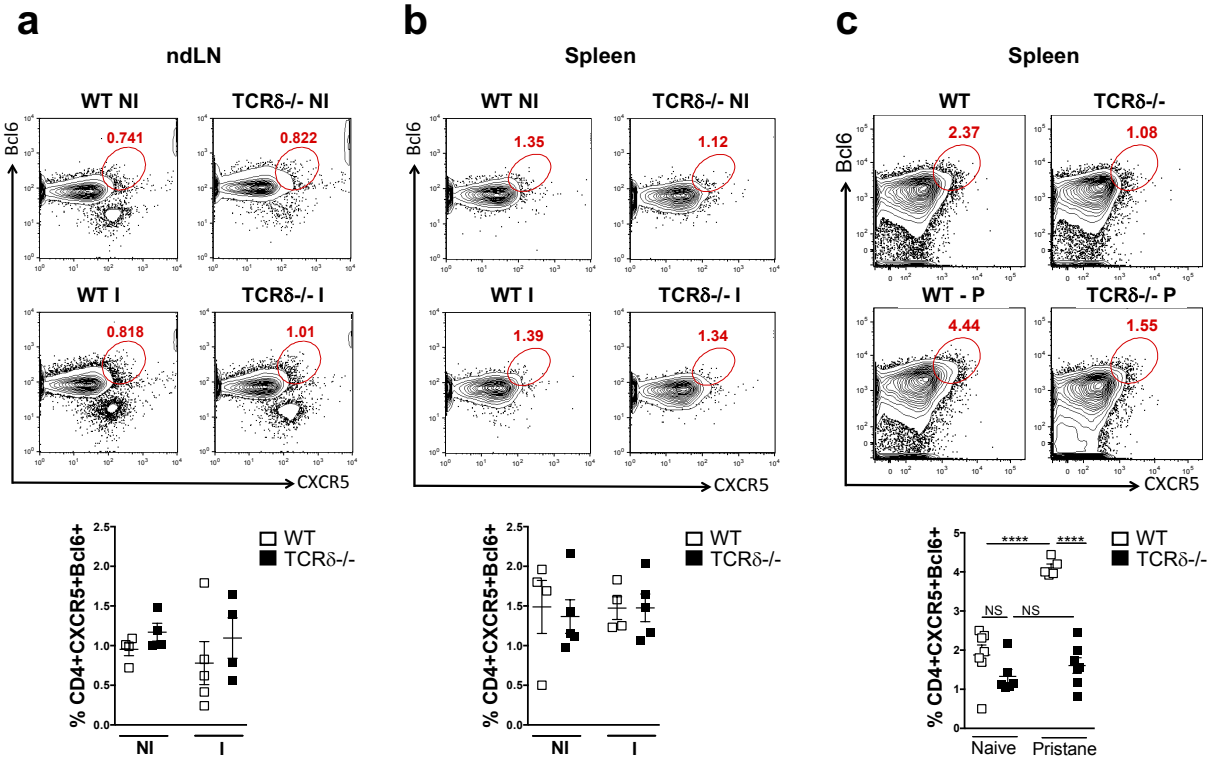

**Supplementary Figure 4.** Tfh cell compartment in TCR $\delta^{-/-}$  mice. **(a, b)** Frequency of CD4<sup>+</sup> T cells expressing CXCR5 and Bcl6 in ndLN **(a)** and spleen **(b)** of non-immunized (NI) WT and TCR $\delta^{-/-}$  mice and 7 days after CFA immunization (I) (n=4-5 mice/group). **(c)** Frequency of CD4<sup>+</sup> T cells expressing CXCR5 and Bcl6 in the spleen of naïve WT and TCR $\delta^{-/-}$  mice and 5 months after pristane injection (WT-P, TCR $\delta^{-/-}$  P) (n=5-8 mice/group). These data are representative of at least 2 independent experiments. Data are shown as mean  $\pm$  SEM. One-way ANOVA was used. NS= non-significant, \*\*\* p<0.001, \*\*\*\* p<0.0001.

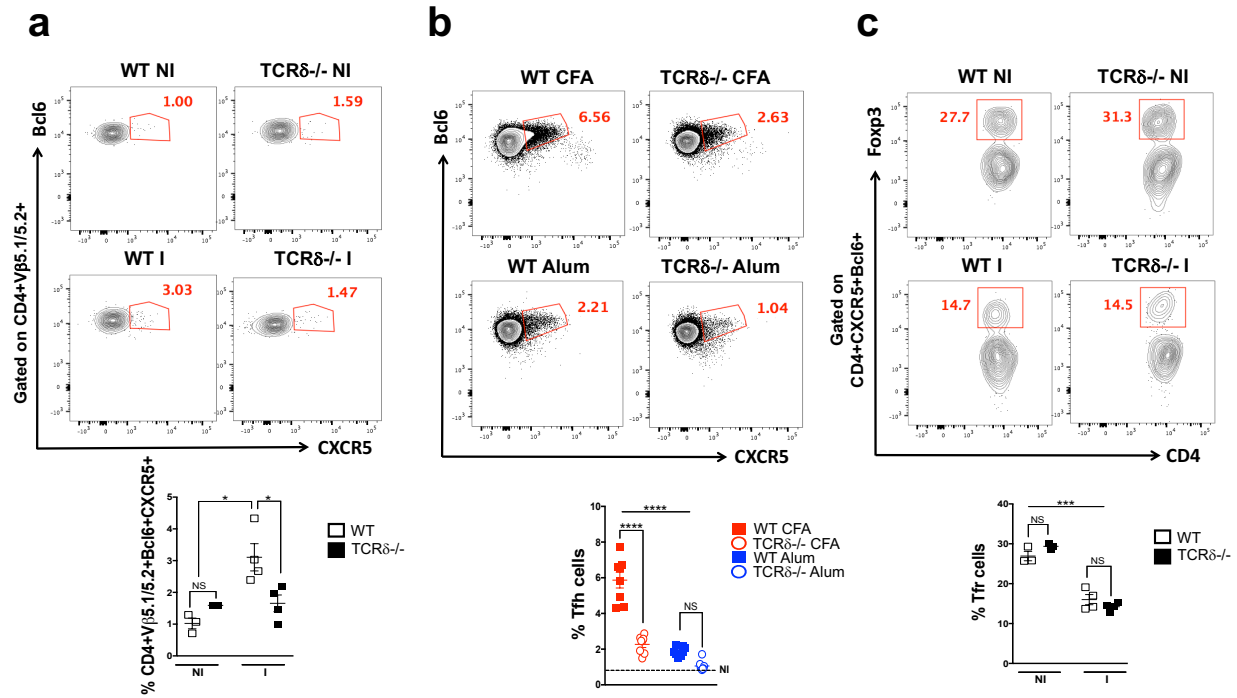

**Supplementary Figure 5.** CFA-immunized TCR $\delta^{-/-}$  mice have reduced OVA-specific Tfh cells, but normal Tfr cell compartment. **(a)** Frequency of TCRV $\beta$ 5.1/5.2 CD4<sup>+</sup> T cells expressing CXCR5 and Bcl6 in dLN of non-immunized (NI) WT and TCR $\delta^{-/-}$  mice and 7 days after CFA immunization (I) (n=3-4 mice/group). **(b)** Frequency of CD4<sup>+</sup> T cells expressing CXCR5 and Bcl6 in dLN from WT and TCR $\delta^{-/-}$  mice 7 days after either CFA or Alum immunization (n=8 mice/group). **(c)** Frequency of Foxp3 expression in CD4<sup>+</sup>CXCR5<sup>+</sup>Bcl6<sup>+</sup> (T follicular regulatory, Tfr) cells in the dLN of non-immunized (NI) WT and TCR $\delta^{-/-}$  mice and 7 days after CFA immunization (I) (n=3-4 mice/group). These data are representative 2 independent experiments. Data are shown as mean  $\pm$  SEM. One-way ANOVA was used. NS= non-significant, \* p<0.05, \*\*\* p<0.001, \*\*\*\* p<0.0001.

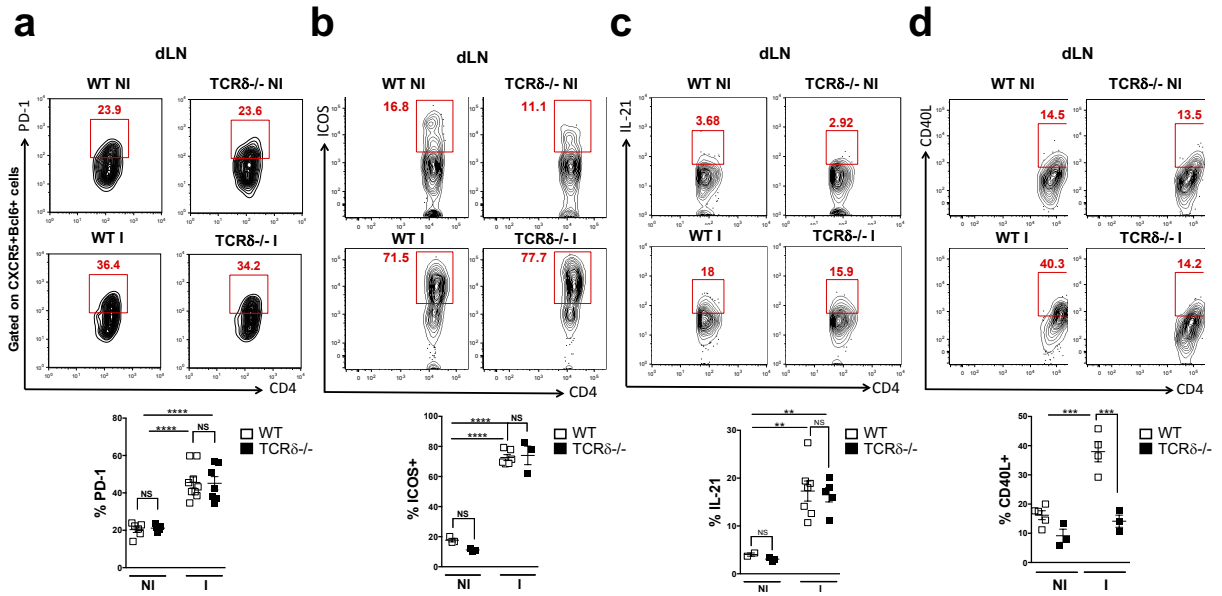

**Supplementary Figure 6.** Characterization of Tfh cell in WT vs. TCRδ<sup>-/-</sup> mice. **(a-d)** Frequency of Tfh cells expressing PD-1 **(a)**, ICOS **(b)**, IL21 **(c)** and CD40L **(d)** in dLN of non-immunized (NI) WT and TCRδ<sup>-/-</sup> mice and 7 days after CFA immunization (I) (n=3-9 mice/group). These data are representative of 3 independent experiments. Data are shown as mean ± SEM. One-way ANOVA was used. NS= non-significant, \*\* p<0.01, \*\*\* p<0.001, \*\*\*\* p<0.0001.

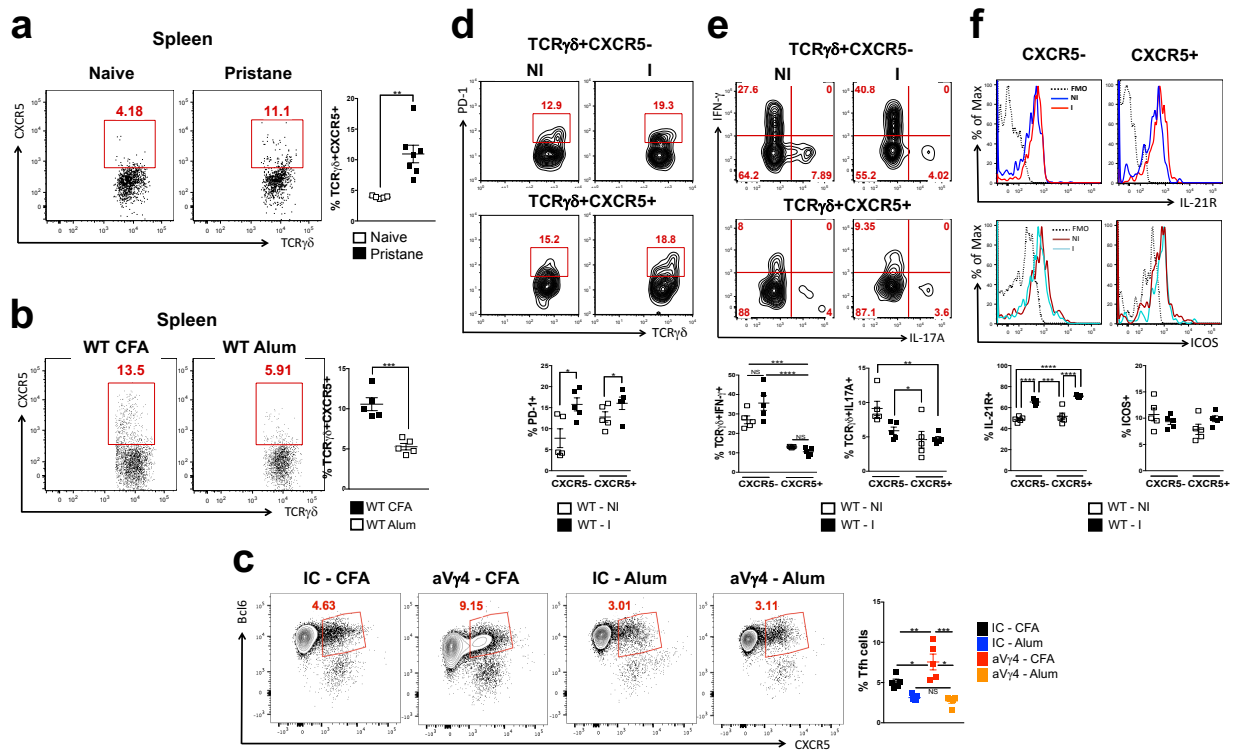

**Supplementary Figure 7.** CXCR5-expressing  $\gamma\delta$  T cells share some features with Tfh cells. **(a)** Frequency of  $\gamma\delta$  T cells expressing CXCR5 in the spleen of naïve WT mice and 5 months after pristane injection (Pristane) (n=6 mice/group). **(b)** Frequency of  $\gamma\delta$  T cells expressing CXCR5 in the spleen of WT and TCR $\delta$ <sup>-/-</sup> mice 21 days after s.c. immunization with either CFA/OVA or Alum/OVA. Mice received a boost of OVA 14 days after immunization (n=5 mice/group). **(c)** Frequency of CD4<sup>+</sup> T cells expressing CXCR5 and Bcl6 in the spleen from mice treated with either anti-V $\gamma$ 4 mAb (aV $\gamma$ 4) or isotype control (IC) 21 days post CFA/OVA or Alum/OVA immunization (n=5 mice/group). **(d)** Frequency of PD-1-expressing TCR $\gamma\delta$ +CXCR5<sup>-</sup> and TCR $\gamma\delta$ +CXCR5<sup>+</sup> cells from dLN of non-immunized (NI) WT mice and 7 days after CFA immunization (I) (n=5 mice/group). **(e)** Frequency of IFN- $\gamma$  and IL-17A-expressing TCR $\gamma\delta$ +CXCR5<sup>-</sup> and TCR $\gamma\delta$ +CXCR5<sup>+</sup> cells from dLN of non-immunized (NI) WT mice and 7 days after CFA immunization (I) (n=5 mice/group). **(f)** Histogram and frequency of IL-21 receptor (IL-21R) and ICOS-expressing TCR $\gamma\delta$ +CXCR5<sup>-</sup> and TCR $\gamma\delta$ +CXCR5<sup>+</sup> cells from dLN of non-immunized (NI) WT mice and 7 days after CFA immunization (I) (n=5 mice/group). These data are representative of 2 independent experiments. Data are shown as mean  $\pm$  SEM. Student's *t*-test (**a, b**) and One-way ANOVA (**c-e**) were used. \* *p*<0.05, \*\* *p*<0.01, \*\*\* *p*<0.001, \*\*\*\* *p*<0.0001.



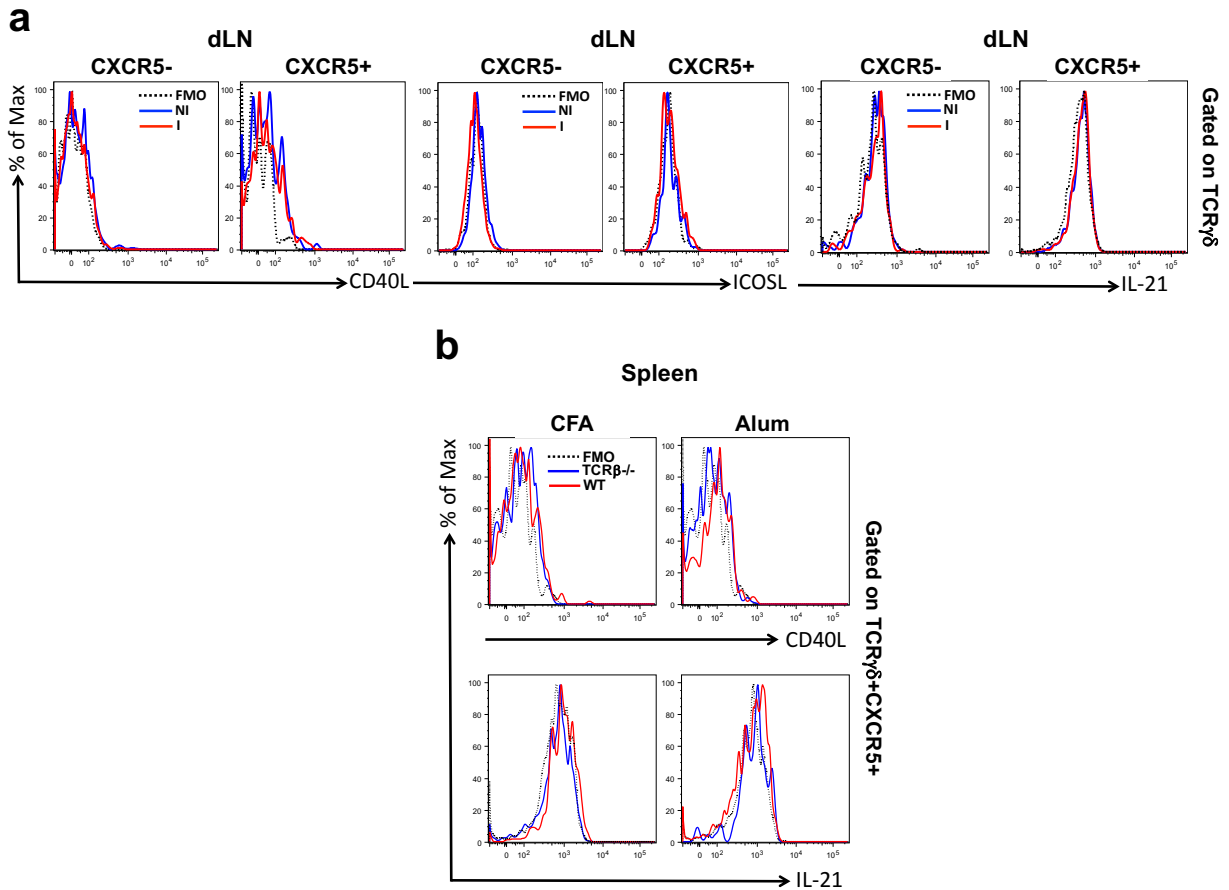

**Supplementary Figure 8.** CXCR5-expressing  $\gamma\delta$  T cells do not directly help B cells. **(a)** Representative histograms of TCR $\gamma\delta$ +CXCR5<sup>-</sup> and TCR $\gamma\delta$ +CXCR5<sup>+</sup> cells expressing CD40L, ICOSL and IL-21 in dLN of non-immunized (NI) WT mice and 7 days after CFA immunization (I) (n=3-5 mice/group). **(b)** Representative histograms of TCR $\gamma\delta$ +CXCR5<sup>+</sup> cells from spleen of WT, TCR $\beta^{-/-}$  and TCR $\delta^{-/-}$  mice expressing CD40L and IL-21, 21 days after s.c. immunization with either CFA/OVA or Alum/OVA. Mice received a boost of OVA 14 days after immunization (n=5 mice/group).

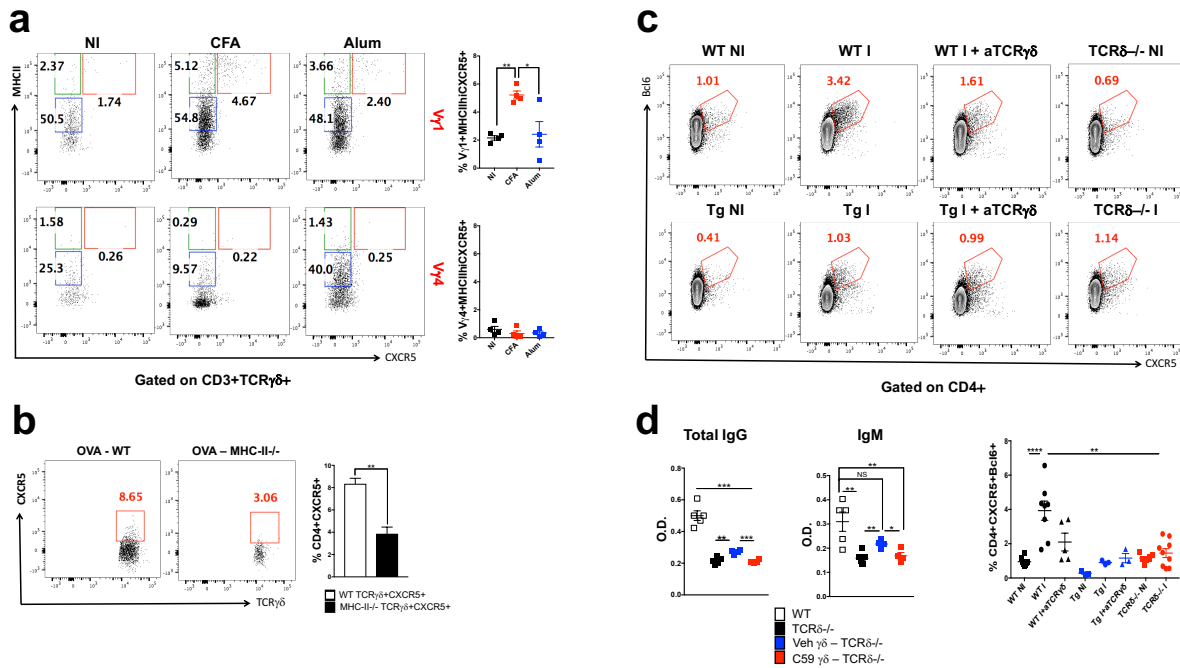

**Supplementary Figure 9.**  $\beta$ -catenin-dependent control of antibody production by  $\gamma\delta$  T cells, antigen presentation properties of TCR $\gamma\delta$ +CXCR5+ cells and TCF-1 involvement in Tfh cell differentiation. **(a)** Frequency of V $\gamma$ 1 and V $\gamma$ 4  $\gamma\delta$  T cells expressing CXCR5 and MHC-II from dLN of non-immunized (NI) WT mice and 3 days after either CFA or Alum immunization (n=4 mice/group). **(b)** CXCR5 expression on CellTrace Violet-stained naïve CD4 T cells from OT-II-Foxp3-GFP mice co-cultured (3 days at 37°C) with or without OVA<sub>323-339</sub>-loaded TCR $\gamma\delta$ +CXCR5+ from dLN of WT or MHC-II<sup>-/-</sup> mice 4 days after CFA immunization (n=pooled cells from 10 mice/experiment). **(c)** Frequency of CD4<sup>+</sup> T cells expressing CXCR5 and Bcl6 in dLNs of non-immunized (NI) WT, Tcf7L Tg and TCR $\delta$ <sup>-/-</sup> mice and 7 days after CFA immunization (I). Mice were treated with either anti-TCR $\gamma\delta$  (aTCR $\gamma\delta$ ; 250  $\mu$ g, i.p.) or isotype control 7 days before CFA immunization (n=3-8 mice/group). **(d)** Serum OVA-specific total IgG and IgM from WT, TCR $\delta$ <sup>-/-</sup> and TCR $\delta$ <sup>-/-</sup> mice transferred with  $\gamma\delta$  T cells from WT mice treated with either 10 mg/ml of Wnt-C59 (C59) or vehicle (Veh). WT mice were sacrificed 24h after Wnt-C59 or vehicle treatment and a total of  $5 \times 10^5$   $\gamma\delta$  T cells were intravenously injected into TCR $\delta$ <sup>-/-</sup> mice, which were then immunized with CFA, boosted with OVA 14 days later and sacrificed 7 days thereafter (n=4 mice/group). These data are representative of at least 2 independent experiments. Data are shown as mean  $\pm$  SEM. Two-way ANOVA **(a)**, One-way ANOVA **(c, d)** or Student's *t*-test **(b)** were used. \*  $p < 0.05$ , \*\*  $p < 0.01$ , \*\*\*  $p < 0.001$ , \*\*\*\*  $p < 0.0001$ .

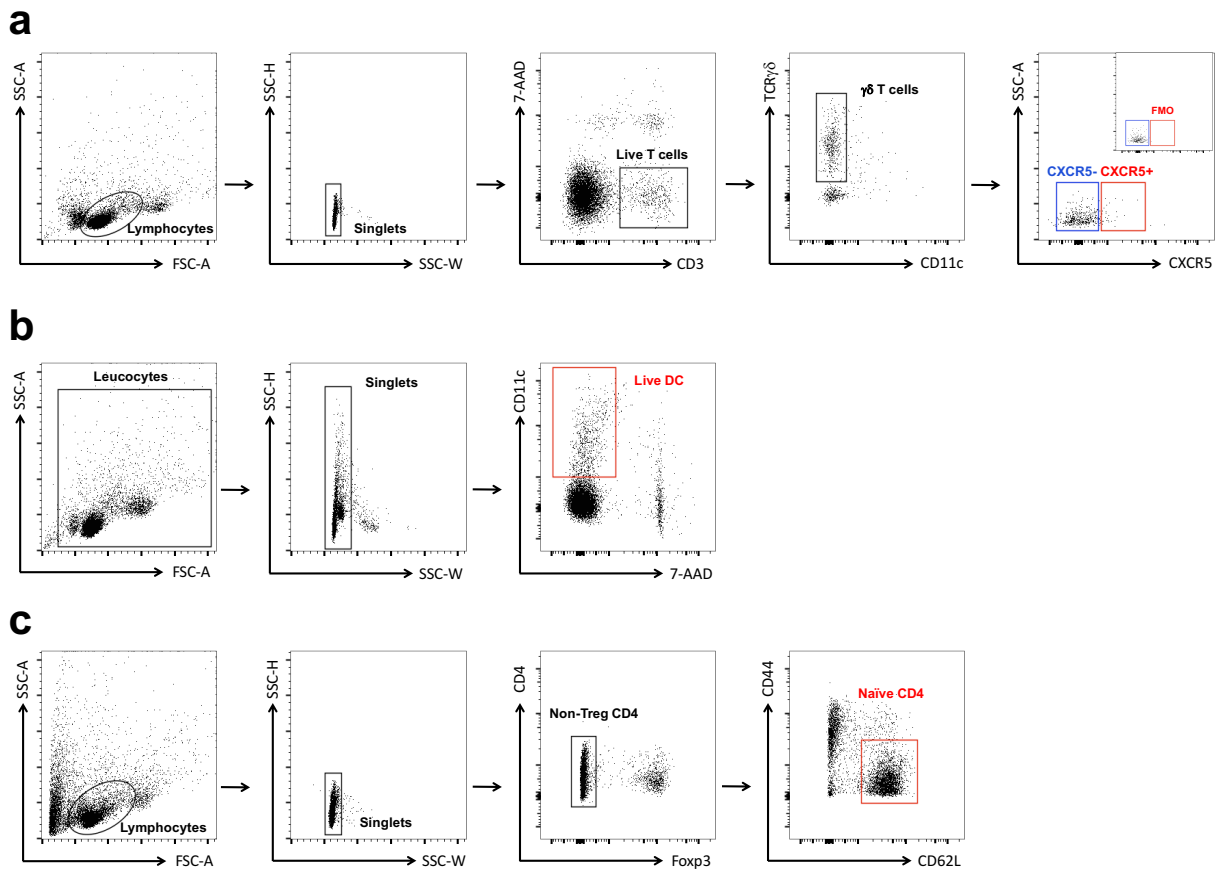

**Supplementary Figure 10.** Gating strategies for cell sorting. **(a)** Representative dot plots used for CXCR5- and CXCR5+  $\gamma\delta$  T cell sorting. Inset dot plot shows the fluorescence minus one (FMO) control for CXCR5 staining. **(b)** Representative dot plots used for CD11c+ dendritic cell (DC) sorting. **(c)** Representative dot plots used for naïve CD4 T cell sorting.
